# Supplementary material for: Preservation potential of keratin in deep time
Source: PubMed Central journal article supplement (PMC6261410; doi:10.1371/journal.pone.0206569), 2018-11-28

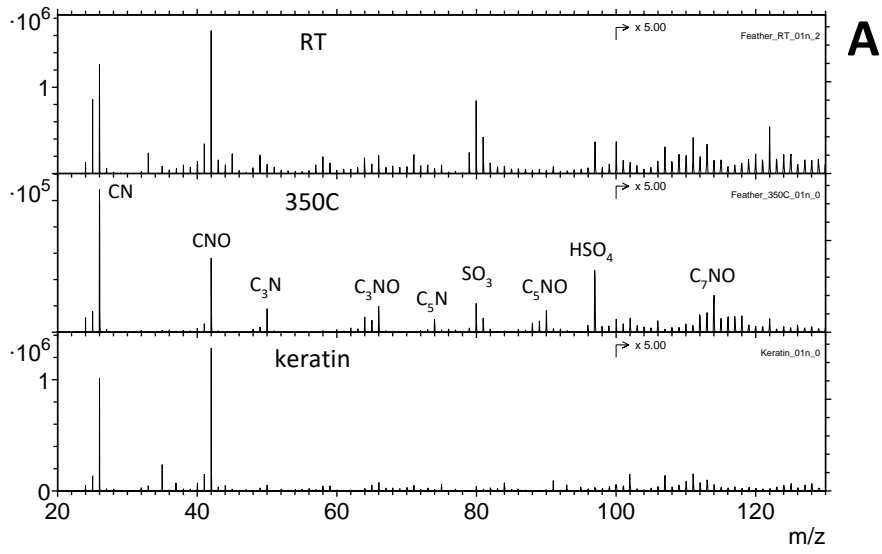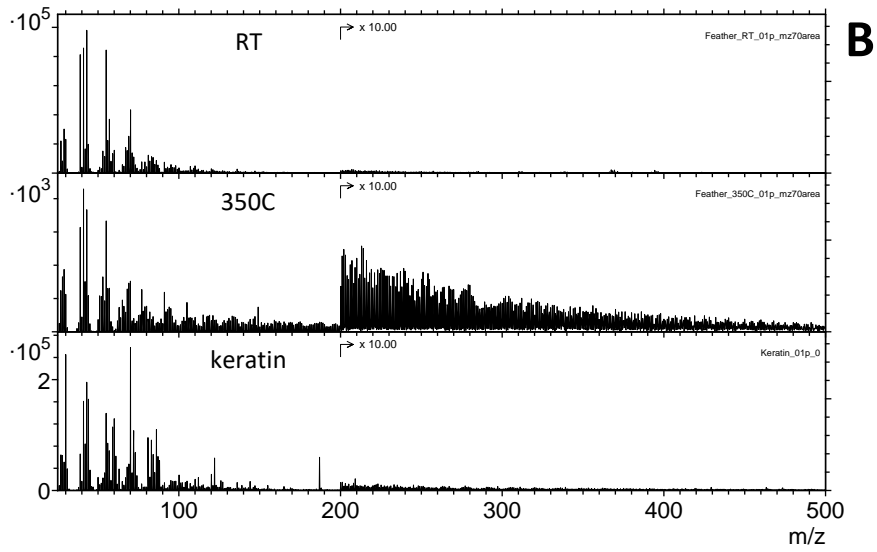

Supplement: pone.0206569.s006.pdf [file pone.0206569.s006.pdf]
